# Supplementary material for: Changes in Bulk and Rhizosphere Soil Microbial Diversity Communities of Native Quinoa Due to the Monocropping in the Peruvian Central Andes
Source: MDPI journal article supplement (doi:10.3390/microorganisms11081926), 2023-07-28
Supplement: s1 [file s1]

| Sample and replicates | Edaphic factors |      |       |      |       |       |       |       |      |      |      |        | Shannon | Observe features |     | Faith PD |         |         |
|-----------------------|-----------------|------|-------|------|-------|-------|-------|-------|------|------|------|--------|---------|------------------|-----|----------|---------|---------|
|                       | pH              | E.C  | CaCO3 | O.M  | P ppm | K ppm | CIC   | Ca+2  | Mg+2 | K+   | Na+  | % Sand | B       | F                | B   | F        | B       | F       |
| FRS R1                | 8.16            | 0.19 | 10.1  | 2.07 | 8     | 439   | 27.2  | 23.92 | 1.88 | 1.23 | 0.17 | 40     | 7.890   | 4.1516           | 784 | 358      | 39.5250 | 57.6901 |
| FRS R2                | 8.13            | 0.21 | 10.2  | 1.98 | 8.8   | 390   | 31.2  | 28.08 | 1.97 | 0.94 | 0.21 | 36     | 6.9104  | 3.9534           | 536 | 317      | 29.4545 | 55.1869 |
| FRS R3                | 8.21            | 0.16 | 10.3  | 1.58 | 8.8   | 371   | 27.84 | 25.05 | 1.78 | 0.78 | 0.23 | 38     | 8.3321  | 3.5101           | 967 | 392      | 43.0372 | 67.3402 |
| DRS R1                | 7.8             | 0.57 | 14.3  | 1.08 | 3.25  | 148   | 21.44 | 18.88 | 1.92 | 0.3  | 0.34 | 42     | 8.0614  | 2.6314           | 685 | 228      | 32.5487 | 44.552  |
| DRS R2                | 8.13            | 0.16 | 14.3  | 0.63 | 4.7   | 190   | 21.6  | 19.09 | 1.82 | 0.47 | 0.23 | 42     | 7.2559  | 3.6263           | 627 | 306      | 32.1099 | 57.0597 |
| DRS R3                | 8.27            | 0.12 | 16.8  | 0.17 | 3.4   | 165   | 22.08 | 18.21 | 1.88 | 0.32 | 0.15 | 38     | 6.7927  | 3.9894           | 703 | 310      | 32.9803 | 52.9554 |

Table S1. Values of edaphic factors and alpha diversity indices of fertile (FRS) and degraded (DRS) rhizospheric soil. B: bacteria, F: fungi.

| Parameters        | Average in FRS     | Average in DRS      |
|-------------------|--------------------|---------------------|
| pH                | 8.17 <sup>a</sup>  | 8.07 <sup>a</sup>   |
| C.E               | 0.19 <sup>a</sup>  | 0.28 <sup>a</sup>   |
| CaCO <sub>3</sub> | 10.2 <sup>b</sup>  | 15.13 <sup>a</sup>  |
| O.M               | 1.88 <sup>a</sup>  | 0.63 <sup>b</sup>   |
| P (ppm)           | 8.53 <sup>a</sup>  | 13.83 <sup>b</sup>  |
| K (ppm)           | 400 <sup>a</sup>   | 167.67 <sup>b</sup> |
| CIC               | 28.75 <sup>a</sup> | 21.71 <sup>b</sup>  |
| Ca+2              | 25.75 <sup>a</sup> | 18.73 <sup>b</sup>  |
| Mg+2              | 1.88 <sup>a</sup>  | 1.87 <sup>a</sup>   |
| K+                | 0.98 <sup>a</sup>  | 0.36 <sup>b</sup>   |
| Na+               | 0.2 <sup>a</sup>   | 0.24 <sup>a</sup>   |
| % Sand            | 38 <sup>a</sup>    | 40.67 <sup>a</sup>  |
| % Silt            | 27 <sup>b</sup>    | 32.33 <sup>a</sup>  |
| % Clay            | 35 <sup>a</sup>    | 27 <sup>b</sup>     |

Table S2. Paired t-test on soil physicochemical variables. Different letters indicate significance (at  $p < 0.05$ ). FRS: rhizosphere soil, DRS: Degraded rhizosphere soil.

| <b>BACTERIA</b> | Phylum         |          | p-value |
|-----------------|----------------|----------|---------|
|                 | Actinobacteria | DRS-DBS  | 0.1047  |
|                 |                | FBS- DBS | 0.3143  |
|                 |                | FRS-DBS  | 0.8948  |
|                 |                | FBS-DRS  | 0.0082* |
|                 |                | FRS-DRS  | 0.2710  |
|                 |                | FRS-FBS  | 0.1234  |
|                 | Acidobacteria  | DRS-DBS  | 0.4328  |
|                 |                | FBS- DBS | 0.2502  |
|                 |                | FRS-DBS  | 0.9798  |
|                 |                | FBS-DRS  | 0.0273* |
|                 |                | FRS-DRS  | 0.2725  |
|                 |                | FRS-FBS  | 0.4014  |
|                 | Chloroflexi    | DRS-DBS  | 0.0001* |
|                 |                | FBS- DBS | 0.2636  |
|                 |                | FRS-DBS  | 0.0009* |
|                 |                | FBS-DRS  | 0.0003* |
|                 |                | FRS-DRS  | 0.0563  |
|                 |                | FRS-FBS  | 0.0098* |
|                 | Planctomycetes | DRS-DBS  | 0.1344  |
|                 |                | FBS- DBS | 0.0025* |
|                 |                | FRS-DBS  | 0.2370  |
|                 |                | FBS-DRS  | 0.0002* |
|                 |                | FRS-DRS  | 0.9739  |
|                 |                | FRS-FBS  | 0.0003* |

Tabla S3. Kruskal-Wallis H test was performed on the five most abundant bacterial phyla. Only those phyla that showed significant differences are reported.

| <b>FUNGI</b> Phylum |          | p-value |
|---------------------|----------|---------|
| Chytridiomycota     | DRS-DBS  | 0.0187* |
|                     | FBS- DBS | 0.9954  |
|                     | FRS-DBS  | 0.0846  |
|                     | FBS-DRS  | 0.0255* |
|                     | FRS-DRS  | 0.7078  |
|                     | FRS-FBS  | 0.1168  |
| Mortierellomycota   | DRS-DBS  | 0.0002* |
|                     | FBS- DBS | 0.2032  |
|                     | FRS-DBS  | 0.0001* |
|                     | FBS-DRS  | 0.0017* |
|                     | FRS-DRS  | 0.9669  |
|                     | FRS-FBS  | 0.0010* |

Table S4. Kruskal-Wallis H test on the five most abundant fungal phyla. Only those phyla that showed significant differences are reported.
